# Supplementary material
Source: MDPI journal article supplement (https://www.mdpi.com/search?q=molbank-2023-M1551)
Supplement: s003 [file molbank-2023-M1551-s003.mol]

1,2-isomer di(triazolyl)methane

Created by GaussView 6.0.16
 17 18  0  0  0  0  0  0  0  0  0    0
   -0.1692    0.0890   -0.0161 C   0  0  0  0  0  0  0  0  0  0  0  0
    0.3033   -0.8848   -0.1253 H   0  0  0  0  0  0  0  0  0  0  0  0
    0.0627    0.7339   -0.8584 H   0  0  0  0  0  0  0  0  0  0  0  0
    0.3528    0.6947    1.1850 N   0  0  0  0  0  0  0  0  0  0  0  0
    0.8821    2.1543    2.5849 C   0  0  0  0  0  0  0  0  0  0  0  0
    0.9347    0.8859    3.1858 C   0  0  0  0  0  0  0  0  0  0  0  0
    1.0994    3.1273    2.9925 H   0  0  0  0  0  0  0  0  0  0  0  0
    1.2032    0.6015    4.1894 H   0  0  0  0  0  0  0  0  0  0  0  0
   -1.6068   -0.0589    0.0213 N   0  0  0  0  0  0  0  0  0  0  0  0
   -3.6522   -0.5603    0.4459 C   0  0  0  0  0  0  0  0  0  0  0  0
   -4.5806   -0.9508    0.8258 H   0  0  0  0  0  0  0  0  0  0  0  0
   -2.3835    0.6440   -0.8375 N   0  0  0  0  0  0  0  0  0  0  0  0
    0.5899   -0.0258    2.2817 N   0  0  0  0  0  0  0  0  0  0  0  0
    0.5032    2.0094    1.3191 N   0  0  0  0  0  0  0  0  0  0  0  0
   -3.6172    0.3356   -0.5818 N   0  0  0  0  0  0  0  0  0  0  0  0
   -2.3671   -0.8237    0.8416 C   0  0  0  0  0  0  0  0  0  0  0  0
   -1.9419   -1.4461    1.6091 H   0  0  0  0  0  0  0  0  0  0  0  0
  1  2  1  0  0  0  0
  1  3  1  0  0  0  0
  1  4  1  0  0  0  0
  1  9  1  0  0  0  0
  4 13  1  0  0  0  0
  4 14  1  0  0  0  0
  5  6  4  0  0  0  0
  5  7  1  0  0  0  0
  5 14  4  0  0  0  0
  6  8  1  0  0  0  0
  6 13  4  0  0  0  0
  9 12  1  0  0  0  0
  9 16  4  0  0  0  0
 10 11  1  0  0  0  0
 10 15  4  0  0  0  0
 10 16  2  0  0  0  0
 12 15  4  0  0  0  0
 16 17  1  0  0  0  0
M  END
